# Supplementary material for: Multiple Measures: Accurate Ways to Assess Student Achievement
Source: MDPI journal article supplement (doi:10.3390/nu14173451), 2000-01-01
Supplement: s1 [file s1]

**Table S1. Composition of the low and high glycemic diets.**

| <b>Component</b><br>(g/kg)   | <b>LGD</b><br>(Teklad Envigo<br>TD.08485) | <b>HGD</b><br>(Teklad Envigo<br>TD.05230) |
|------------------------------|-------------------------------------------|-------------------------------------------|
| Casein                       | 195                                       | 195                                       |
| DL-Methionine                | 3                                         | 3                                         |
| Sucrose                      | 120                                       | 341                                       |
| Corn Starch                  | 432.99                                    | 211.99                                    |
| Maltodextrin                 | 100                                       | 100                                       |
| Anhydrous Milkfat            | 37.2                                      | 37.2                                      |
| Soybean Oil                  | 12.8                                      | 12.8                                      |
| Cellulose                    | 50                                        | 50                                        |
| Mineral Mix, (AIN-76 170915) | 35                                        | 35                                        |
| Calcium Carbonate            | 4                                         | 4                                         |
| Vitamin Mix (Teklad 40060)   | 10                                        | 10                                        |
| Ethoxyquin (antioxidant)     | 0.01                                      | 0.01                                      |

**Table S2. Mean body weight of wild type (WT) male and female mice pre- and post-diet intervention with the high glycemic (HGD) and low glycemic (LGD) diets with or without soluble epoxide hydrolase inhibitor (sEHI).**

| Diet intervention                  | WT-LGD   |           | WT-HGD   |           | WT LGD+sEHI |           | WT HGD+sEHI |           |
|------------------------------------|----------|-----------|----------|-----------|-------------|-----------|-------------|-----------|
|                                    | Male     | Female    | Male     | Female    | Male        | Female    | Male        | Female    |
| <b>Baseline (Age 20 weeks)</b>     | 30.5±1.5 | 23.8±1.0* | 30.3±0.6 | 22.9±0.6* | 31.5±1.1    | 27.4±1.1* | 29.3±0.7    | 23.1±0.8* |
| <b>Post Feeding (Age 32 weeks)</b> | 36.2±2.3 | 29.2±1.9* | 34.3±0.9 | 26.2±1.3* | 36.5±2.0    | 26.9±0.4* | 34±1.1      | 24.3±0.5* |

Data shown is mean ± SEM

\* p<0.05 when compared to males in the same diet and inhibitor group.

**Table S3. Plasma Glucose and Insulins levels of wild type (WT) male and female mice post-diet intervention with the low glycemic diet (LGD) and high glycemic diet (HGD) with and without soluble epoxide hydrolase inhibitor (sEHI) treatment.**

|                        | WT-LGD      |            | WT-HGD      |             | WT-LGD+sEHI |             | WT-HGD+sEHI |             |
|------------------------|-------------|------------|-------------|-------------|-------------|-------------|-------------|-------------|
|                        | Female      | Male       | Female      | Male        | Female      | Male        | Female      | Male        |
|                        | Mean±SEM    |            |             |             |             |             |             |             |
| <b>Glucose (mg/dL)</b> | 282.9±29.1* | 416.1±41.0 | 311.0± 27.2 | 349.6± 36.8 | 319.4± 44.6 | 432.7± 48.6 | 448.6± 32.3 | 428±69.8    |
| <b>Insulin (pg/dL)</b> | 331.8±125.1 | 230.5±65.6 | 187.8± 27.9 | 215.4± 85.7 | 332.4± 64.4 | 285.4± 53.9 | 219.9±44.2  | 297.4± 70.9 |

\* p<0.05 when compared to males in the same diet and inhibitor group

**Table S4. Sex differences in disease associations of differentially expressed genes in common between male and female diet/inhibitor comparison groups.**

|                                                              |
|--------------------------------------------------------------|
| <b>M HGD vs LGD compared to F HGD vs LGD</b>                 |
| Cognitive Therapy                                            |
| Anxiety Disorders                                            |
| Intelligence Tests                                           |
| Arterial Pressure                                            |
| Coronary Artery Disease                                      |
| Blood Pressure                                               |
| Response to cognitive-behavioral therapy in anxiety disorder |
| <b>M LGD+sEHI vs LGD compared to F LGD+sEHI vs LGD</b>       |
| Progressive cerebellar ataxia                                |
| Cerebellar atrophy                                           |
| Cerebellar degeneration                                      |
| Alzheimer's Disease                                          |
| <b>M HGD+sEHI vs HGD compared to F HGD+sEHI vs HGD</b>       |
| Major depressive disorder                                    |
| Coronary artery disease                                      |
| Diastolic blood pressure                                     |
| Memory                                                       |
| Migraine Disorders                                           |
